# Supplementary material for: Synthesis, Structural and Behavioral Studies of Indole Derivatives D2AAK5, D2AAK6 and D2AAK7 as Serotonin 5-HT1A and 5-HT2A Receptor Ligands
Source: MDPI journal article supplement (doi:10.3390/molecules28010383), 2023-01-02

## *Supplementary Information*

# **Synthesis, structural and behavioral studies of D2AAK5, D2AAK6 and D2AAK7 as serotonin 5-HT<sub>1A</sub> and 5-HT<sub>2A</sub> receptor ligands**

**Agnieszka A. Kaczor<sup>1,2\*</sup>, Ewa Kędzierska<sup>3</sup>, Tomasz M. Wróbel<sup>1</sup>, Angelika Grudzińska<sup>1</sup>, Angelika Pawlak<sup>1</sup>, Tuomo Laitinen<sup>2</sup> and Agata Bartyzel<sup>3</sup>**

<sup>1</sup> Department of Synthesis and Chemical Technology of Pharmaceutical Substances with Computer Modeling Laboratory, Faculty of Pharmacy, Medical University of Lublin, 4A Chodźki St., PL-20093 Lublin, Poland

<sup>2</sup> School of Pharmacy, University of Eastern Finland, FI-70211 Kuopio, Finland

<sup>3</sup> Department of Pharmacology and Pharmacodynamics, Faculty of Pharmacy, Medical University of Lublin, 4A Chodźki St., PL-20093 Lublin, Poland

<sup>4</sup> Department of General and Coordination Chemistry and Crystallography, Institute of Chemical Sciences, Faculty of Chemistry, Maria Curie-Skłodowska University, M. Curie-Skłodowskiej Sq. 2, PL-20031 Lublin, Poland

\* Correspondence: agnieszka.kaczor@umlub.pl, Tel +48 81 448 7273 (A.A.K.)

Supplementary Table S1 and S2.

Supplementary Figure S1- S4.

<sup>1</sup>H and <sup>13</sup>C NMR, HRMS and IR spectra of the investigated compounds.

**Table S1.** Interatomic distances and selected bond angles for D2AAK5.

| <i>Bond lengths (Å)</i>   |          |                |          |
|---------------------------|----------|----------------|----------|
| C1-C2                     | 1.364(4) | C11-C12        | 1.500(3) |
| C1-C8                     | 1.438(4) | C12-C13        | 1.384(4) |
| C1-C9                     | 1.501(3) | C12-C20        | 1.394(4) |
| C2-N1                     | 1.379(3) | C13-C14        | 1.387(3) |
| C3-N1                     | 1.376(4) | C14-C15        | 1.389(4) |
| C3-C4                     | 1.398(4) | C14-Cl1        | 1.732(3) |
| C3-C8                     | 1.419(3) | C15-O1         | 1.373(3) |
| C4-C5                     | 1.360(4) | C15-C19        | 1.404(4) |
| C5-F1                     | 1.367(3) | C16-O1         | 1.450(3) |
| C5-C6                     | 1.386(4) | C16-C17        | 1.503(4) |
| C6-C7                     | 1.382(4) | C17-C18        | 1.515(4) |
| C7-C8                     | 1.395(4) | C18-O2         | 1.449(3) |
| C9-C10                    | 1.522(4) | C19-O2         | 1.372(3) |
| C10-N2                    | 1.495(3) | C19-C20        | 1.388(3) |
| C11-N2                    | 1.492(3) |                |          |
| <i>Bond angles (°)</i>    |          |                |          |
| C2-C1-C8                  | 107.3(2) | N2-C10-C9      | 112.0(2) |
| C1-C2-N1                  | 109.6(3) | N2-C11-C12     | 113.4(2) |
| C3-N1-C2                  | 109.1(2) | C11-N2-C10     | 111.9(2) |
| N1-C3-C8                  | 107.6(2) | C15-C14-Cl1    | 119.1(2) |
| C4-C5-F1                  | 118.1(2) | C13-C14-Cl1    | 118.9(2) |
| F1-C5-C6                  | 117.0(3) | C15-O1-C16     | 116.0(2) |
| C3-C8-C1                  | 106.4(2) | C19-O2-C18     | 117.7(2) |
| C1-C9-C10                 | 110.6(2) |                |          |
| <i>Torsion angles (°)</i> |          |                |          |
| O1-C16-C17-C18            | 68.1(3)  | C17-C16-O1-C15 | -78.9(3) |
| C16-C17-C18-O2            | -66.6(3) | C15-C19-O2-C18 | -59.2(4) |
| O1-C15-C19-O2             | -1.2(4)  | C17-C18-O2-C19 | 76.8(3)  |
| C19-C15-O1-C16            | 60.9(4)  |                |          |

**Table S2.** Hydrogen bonding and C-H...Cg interactions geometry.

| <i>Hydrogen bond [<math>\text{\AA}</math>, <math>^\circ</math>]</i>         |         |           |           |               |
|-----------------------------------------------------------------------------|---------|-----------|-----------|---------------|
| D-H...A                                                                     | d(D-H)  | d(H...A)  | d(D...A)  | $\angle$ DHA  |
| N1-H1N...O1 <sup>i</sup>                                                    | 0.82(3) | 2.26(3)   | 3.034(3)  | 157(3)        |
| O3-H1W...Cl2                                                                | 0.89    | 2.35      | 3.209(2)  | 164           |
| O3-H2W...Cl2 <sup>ii</sup>                                                  | 0.92    | 2.33      | 3.255(2)  | 176           |
| N2-H2N...Cl2                                                                | 0.98(3) | 2.26(3)   | 3.217(3)  | 169(3)        |
| N2-H3N...Cl2 <sup>iii</sup>                                                 | 0.97(3) | 2.17(3)   | 3.130(3)  | 175(2)        |
| C2-H2...F1 <sup>iv</sup>                                                    | 0.95    | 2.40      | 3.338(3)  | 168           |
| C10-H10B...O2 <sup>v</sup>                                                  | 0.99    | 2.55      | 3.424(3)  | 147           |
| C11-H11B...O3                                                               | 0.99    | 2.57      | 3.337(4)  | 134           |
| <i>C-H...Cg interactions [<math>\text{\AA}</math>, <math>^\circ</math>]</i> |         |           |           |               |
| C-H...Cg                                                                    | d(D-H)  | d(H...Cg) | d(C...Cg) | $\angle$ CHCg |
| C16-H16B...Cg1 <sup>ii</sup>                                                | 0.99    | 2.43      | 3.399(3)  | 165           |
| C16-H16B...Cg5 <sup>ii</sup>                                                | 0.99    | 2.78      | 3.651(3)  | 147           |

Symmetry codes: (i)  $x, y, z-1$ ; (ii)  $-x+1, -y+1, -z$ ; (iii)  $-x+1, -y+2, -z$ ; (iv)  $x, y+1, z$ ; (v)  $-x+2, -y+2, -z$ ; Cg1 and Cg5 are the centroids of the N1/C2/C1/C8/C3 and N1/C2/C1/C8/C7/C6/C5/C4/C3 rings, respectively.

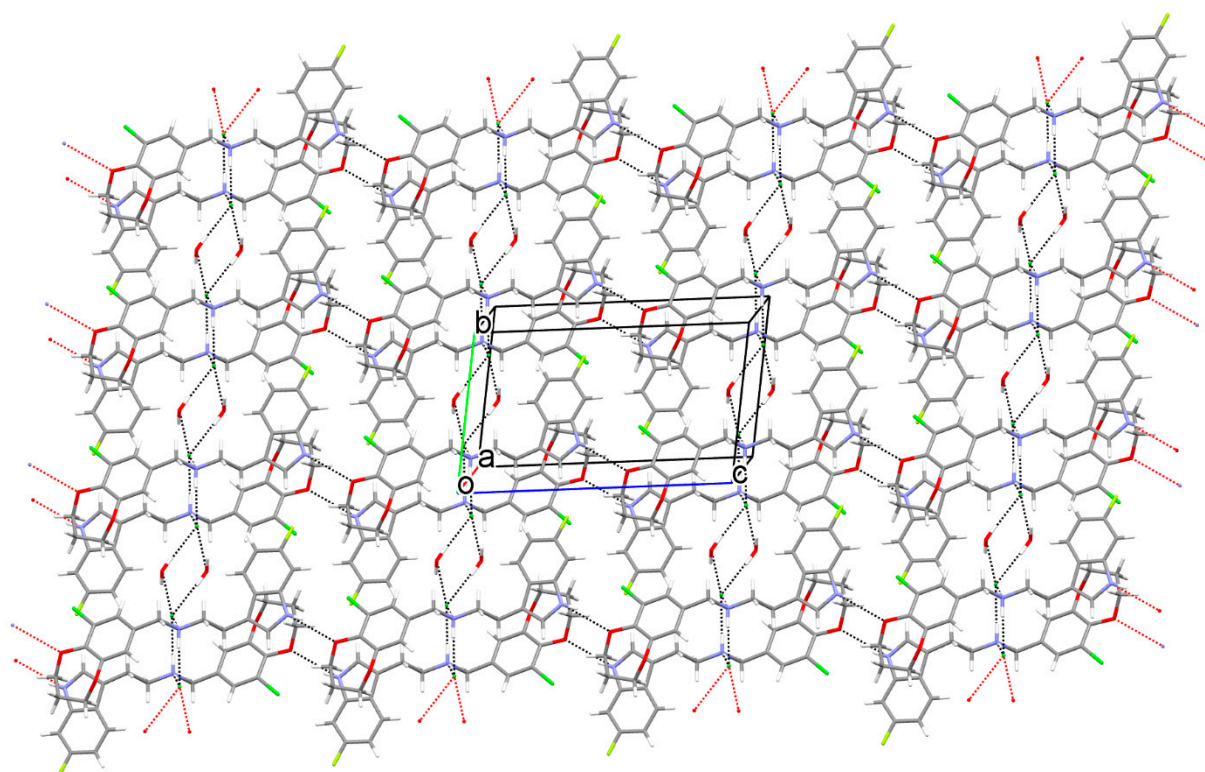**Figure S1.** Packing diagrams of D2AAK5 showing formation sheets viewed along the *a*-axis. Hydrogen bonds are indicated by dotted lines.

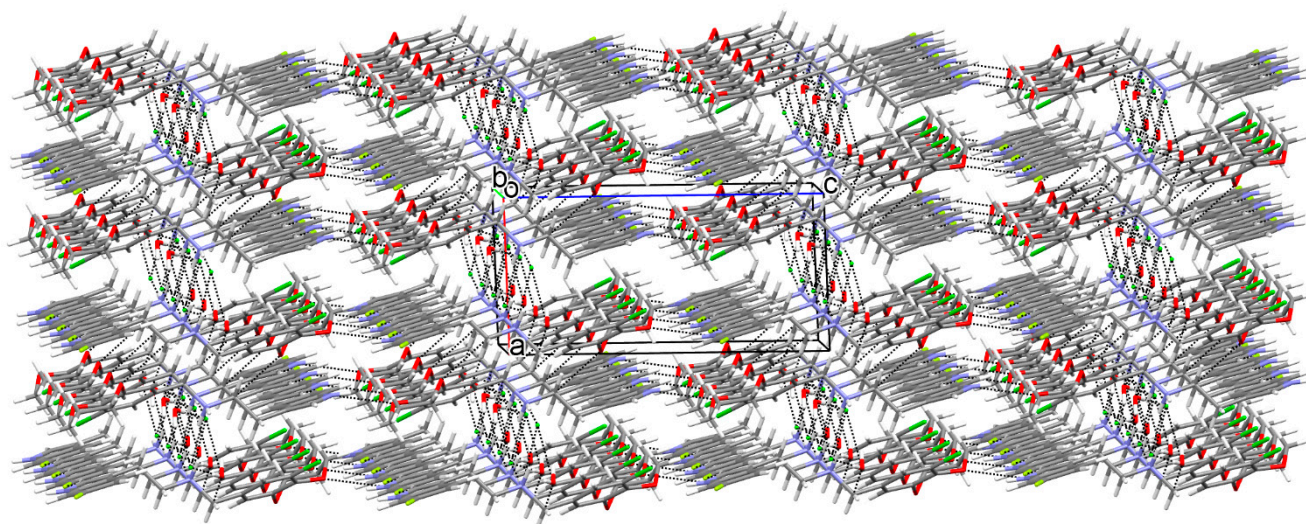

**Figure S2.** The 3D supramolecular structure of the D2AAK5 constructed by the connection of adjacent sheets through C10–H1B···O2 hydrogen bonds. The hydrogen bonds shown as dotted lines. Hanging contact are omitted for clarity.

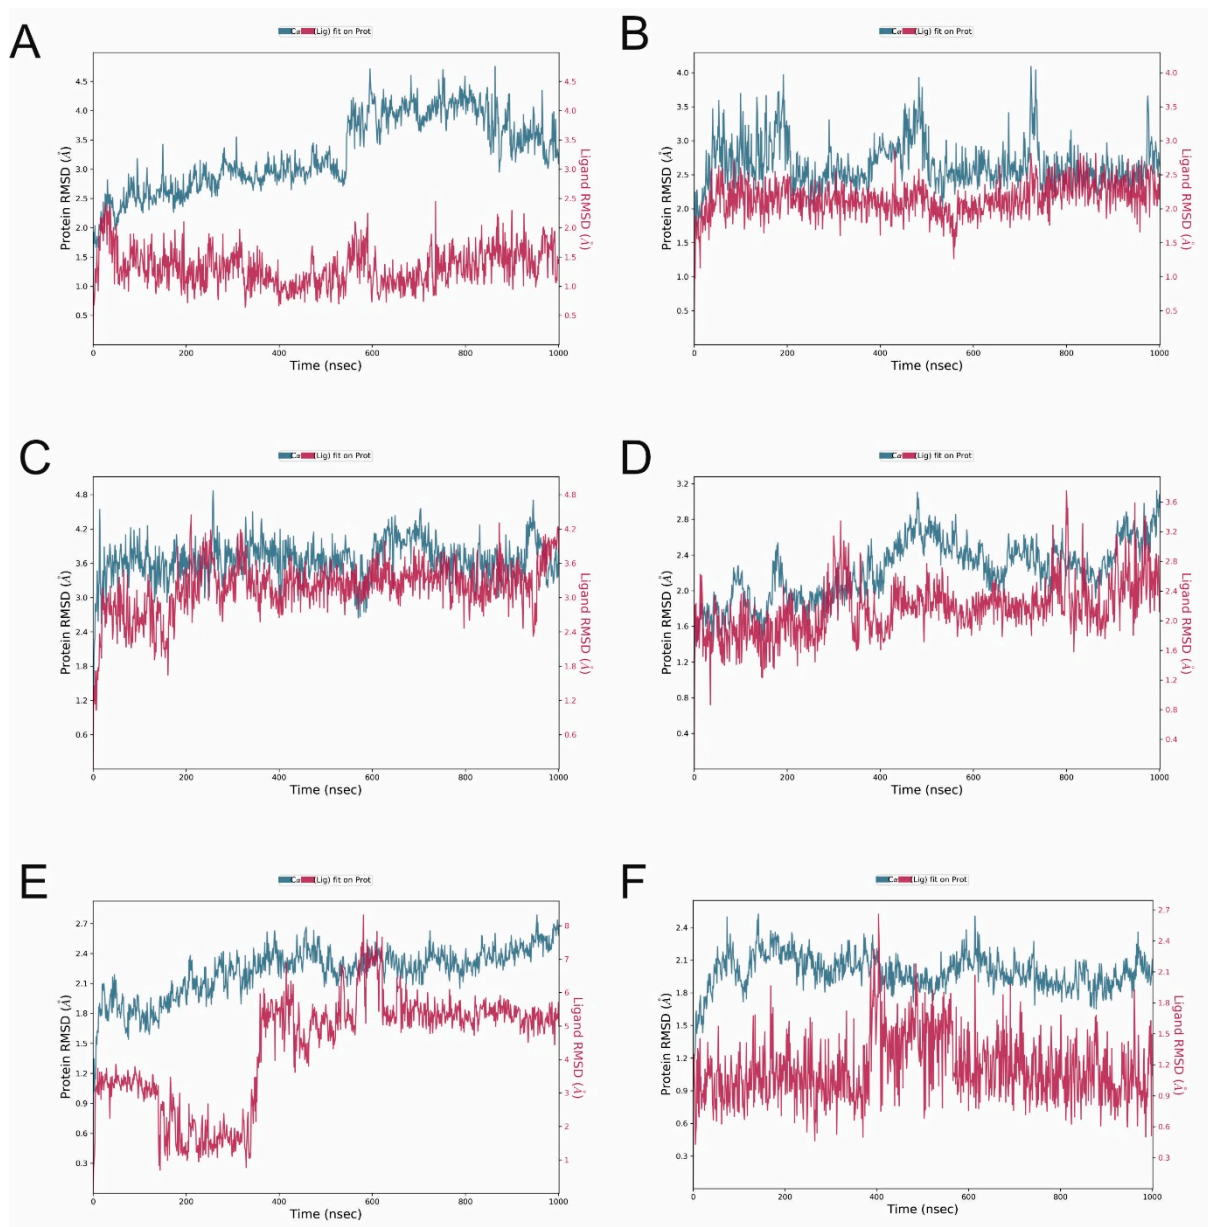

**Figure S3.** Ligand (purple) and protein (blue) C $\alpha$  RMSD during 1  $\mu$ s MD simulations for D2AAK5-5HT<sub>1A</sub> (A), D2AAK6-5HT<sub>1A</sub> (B), D2AAK7-5HT<sub>1A</sub> (C), D2AAK5-5-HT<sub>2A</sub> (D), D2AAK6-5HT<sub>2A</sub> (E) and D2AAK7-5HT<sub>2A</sub> (F) ligand-receptor systems.

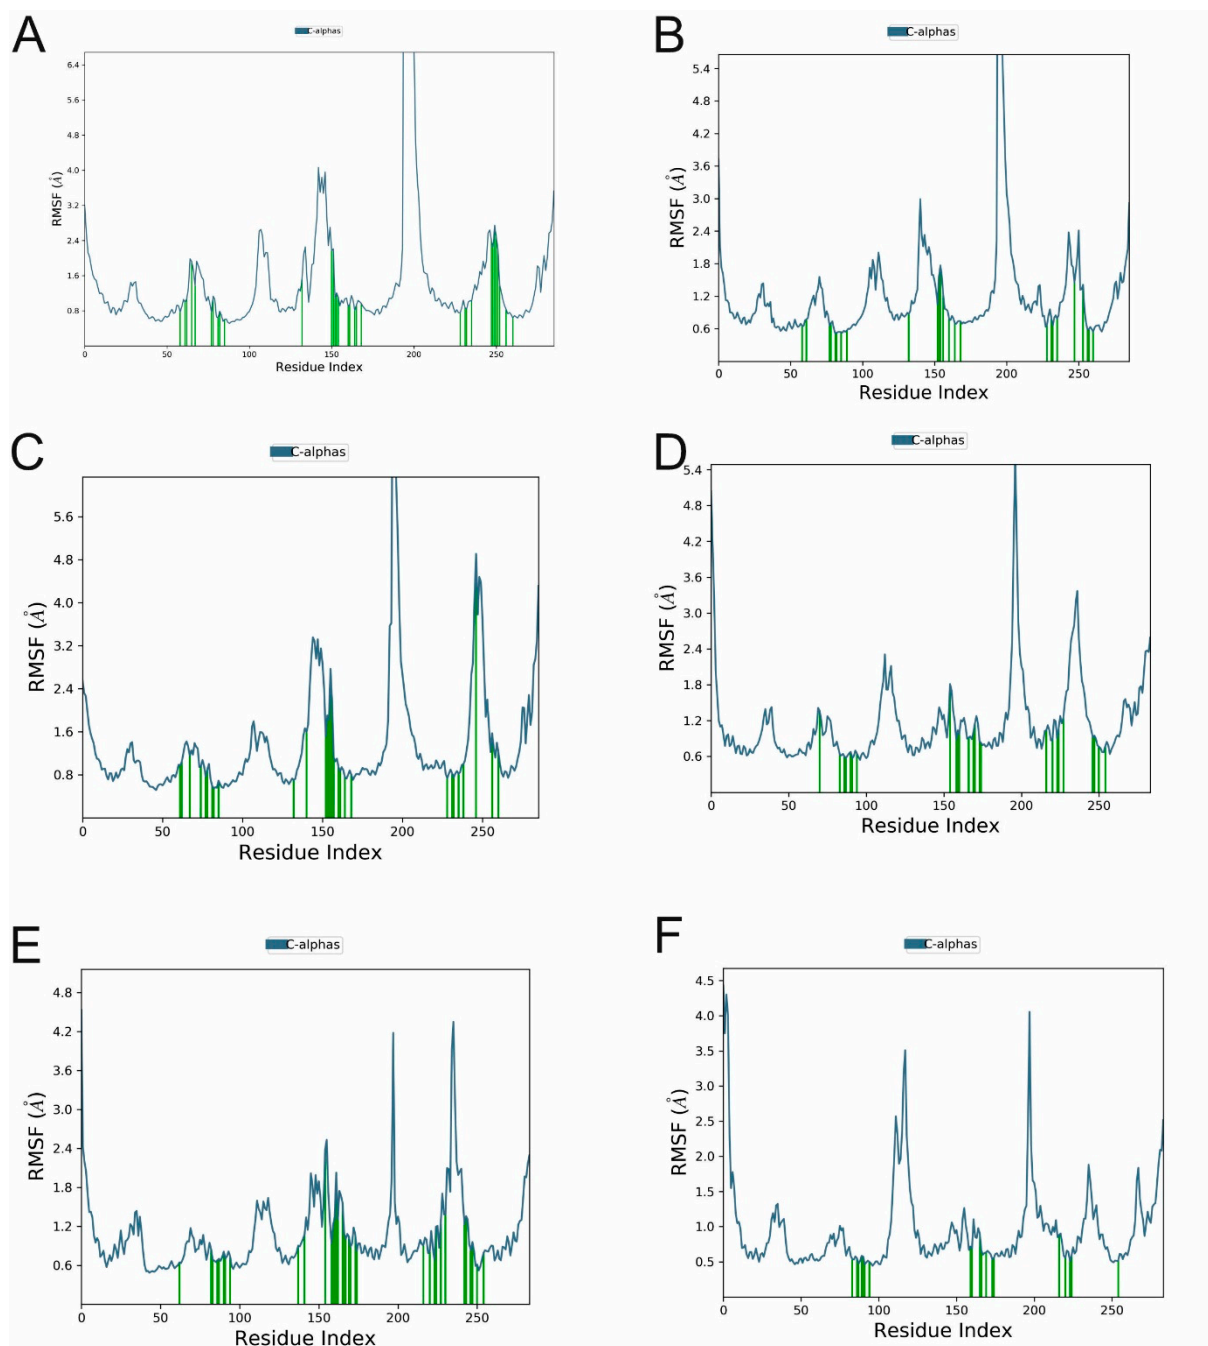

**Figure S4.** Protein C $\alpha$  RMSF during 1  $\mu$ s MD simulations for D2AAK5-5HT<sub>1A</sub> (A), D2AAK6-5HT<sub>1A</sub> (B), D2AAK7-5HT<sub>1A</sub> (C), D2AAK5-5-HT<sub>2A</sub> (D), D2AAK6-5HT<sub>2A</sub> (E) and D2AAK7-5HT<sub>2A</sub> (F) ligand-receptor systems. Protein residues that interact with the ligand are marked with green-colored vertical bars.

**N-((9-chloro-3,4-dihydro-2H-benzo[b][1,4]dioxepin-7-yl)methyl)-2-(6-fluoro-1H-indol-3-yl)ethan-1-amine hydrochloride (D2AAK5)**

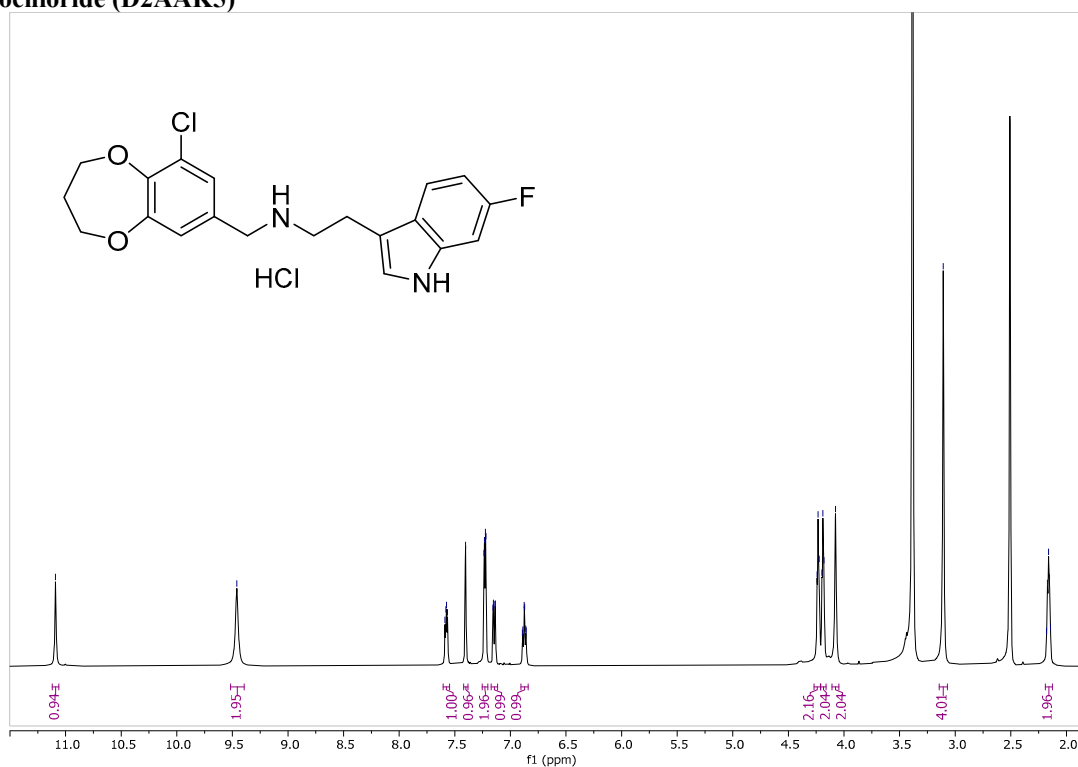

$^1\text{H}$  NMR (600 MHz, DMSO)  $\delta$  11.09 (s, 1H), 9.46 (s, 2H), 7.58 (dd,  $J = 8.7, 5.3$  Hz, 1H), 7.40 (s, 1H), 7.23 (dd,  $J = 7.3, 2.3$  Hz, 2H), 7.15 (dd,  $J = 10.1, 2.4$  Hz, 1H), 6.87 (td,  $J = 9.2, 2.3$  Hz, 1H), 4.23 (t,  $J = 5.5$  Hz, 2H), 4.19 (t,  $J = 5.4$  Hz, 2H), 4.08 (s, 2H), 3.11 (s, 4H), 2.16 (p,  $J = 5.5$  Hz, 2H).

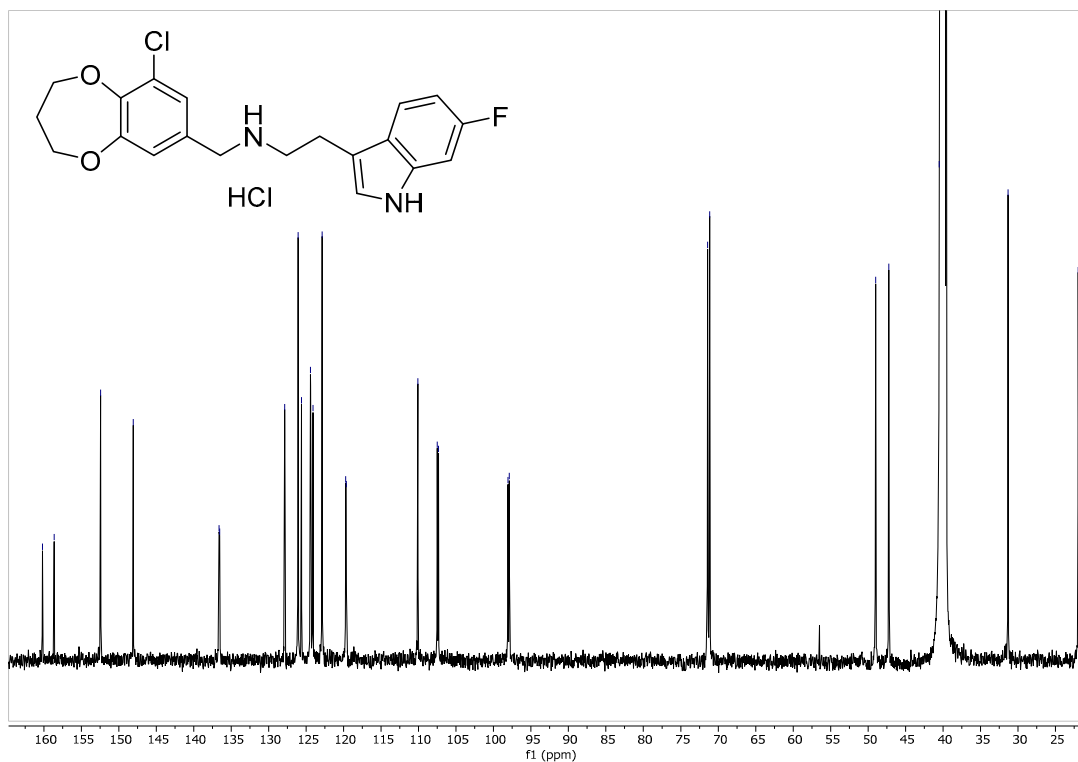

$^{13}\text{C}$  NMR (151 MHz, DMSO)  $\delta$  159.41 (d,  $J = 234.2$  Hz), 152.43, 148.07, 136.59 (d,  $J = 12.7$  Hz), 127.86, 126.08, 125.62, 124.42, 124.09, 122.86, 119.68 (d,  $J = 10.2$  Hz), 110.09, 107.42 (d,  $J = 24.4$  Hz), 97.97 (d,  $J = 25.5$  Hz), 71.42, 71.15, 49.00, 47.23, 31.33, 21.96.



C:/Users/thoma...3\_RA2\_01\_1174.d Injection 1 +MS profile DZAAK3 MS + spectrum 4.53

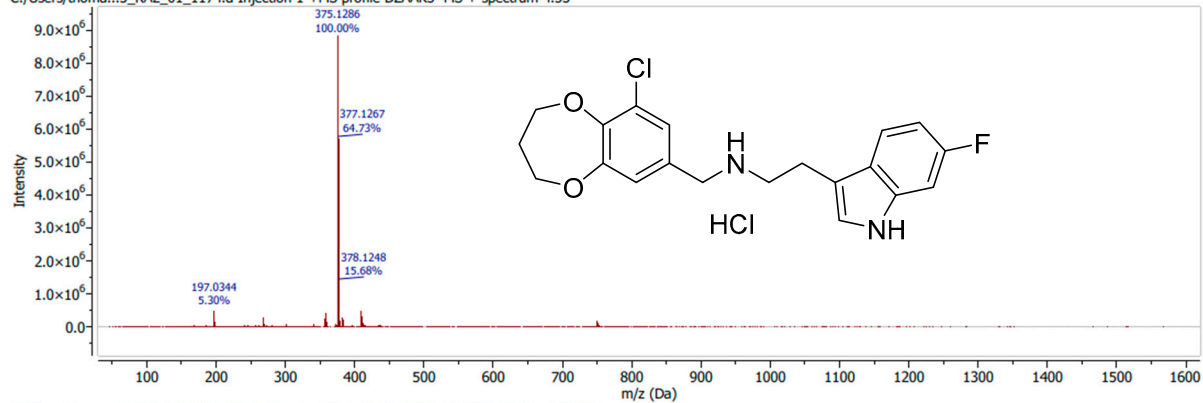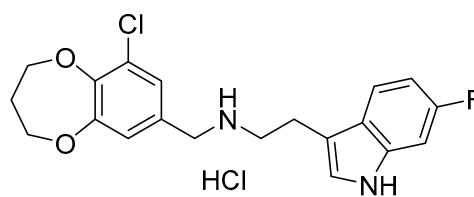

C:/Users/thoma...3\_RA2\_01\_1174.d Injection 1 +MS profile DZAAK3 EIC 375.127 Da ± 0.01 Da

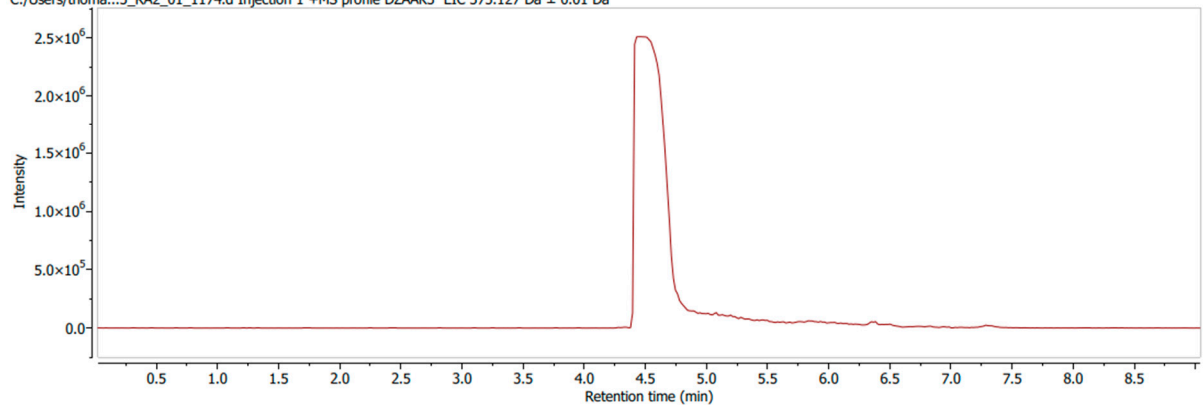

HRMS (ESI) calc. (M+H)<sup>+</sup> 375.1270 exp. (M+H)<sup>+</sup> 375.1286

F:/IR/AG28 - D2AAK5 - Mon Dec 19 13-31-05 2022 (GMT+01-00).SPA -

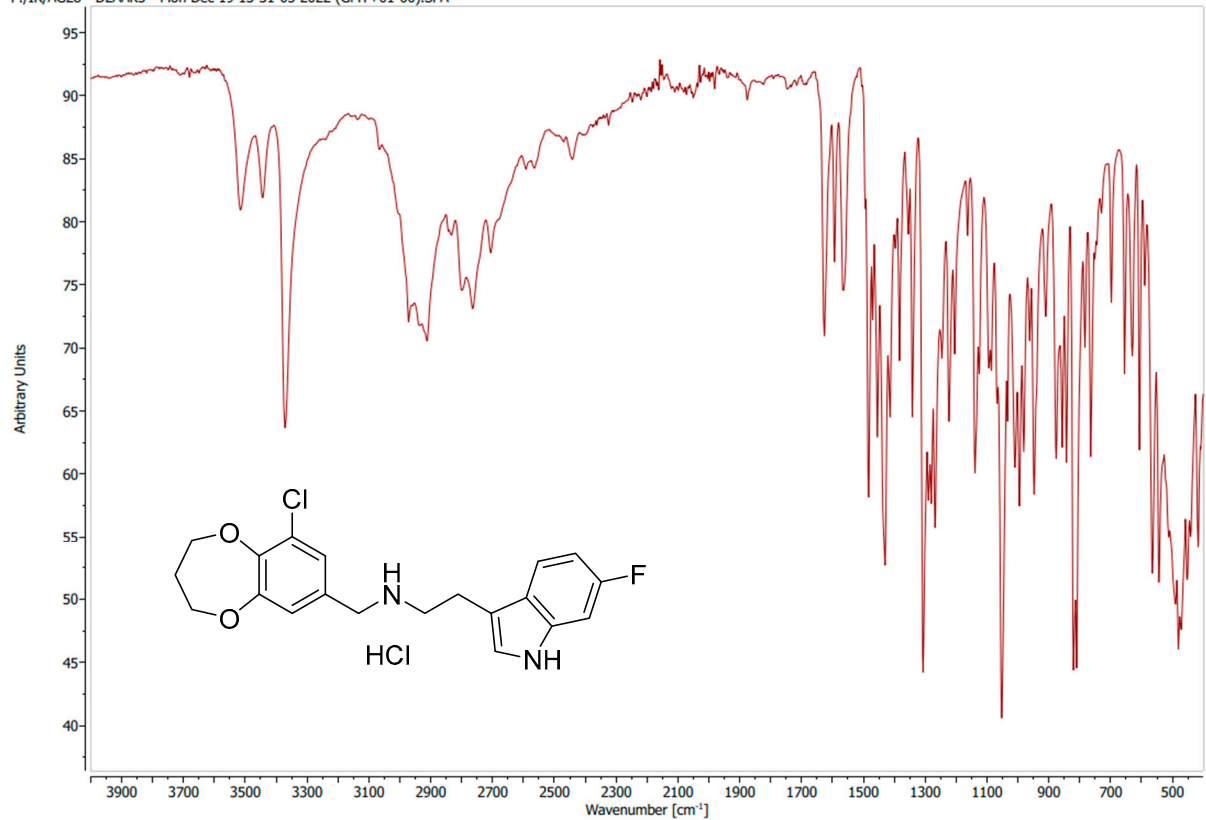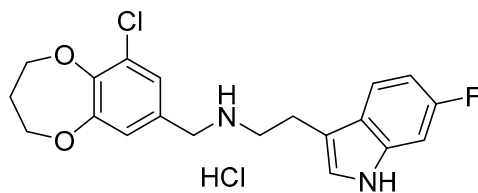



**1-((2-(1H-inden-3-yl)ethyl)amino)-3-(4-fluorophenoxy)propan-2-ol (D2AAK6)**

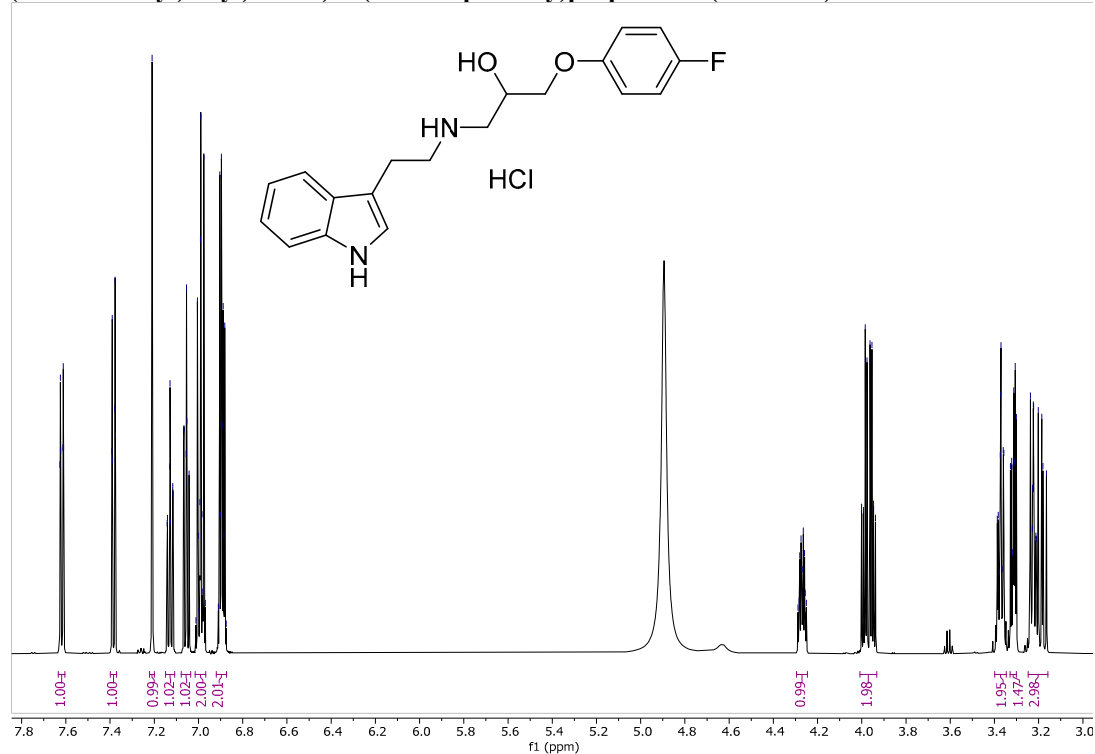

$^1\text{H}$  NMR (600 MHz, MeOD)  $\delta$  7.62 (dt,  $J$  = 7.9, 1.0 Hz, 1H), 7.38 (dt,  $J$  = 8.2, 0.9 Hz, 1H), 7.21 (s, 1H), 7.13 (ddd,  $J$  = 8.1, 7.1, 1.1 Hz, 1H), 7.05 (ddd,  $J$  = 8.0, 7.0, 1.0 Hz, 1H), 7.02 – 6.97 (m, 2H), 6.92 – 6.87 (m, 2H), 4.27 (dtd,  $J$  = 8.3, 5.1, 3.2 Hz, 1H), 4.01 – 3.93 (m, 2H), 3.40 – 3.35 (m, 2H), 3.33 – 3.30 (m, 1H), 3.25 – 3.16 (m, 3H).

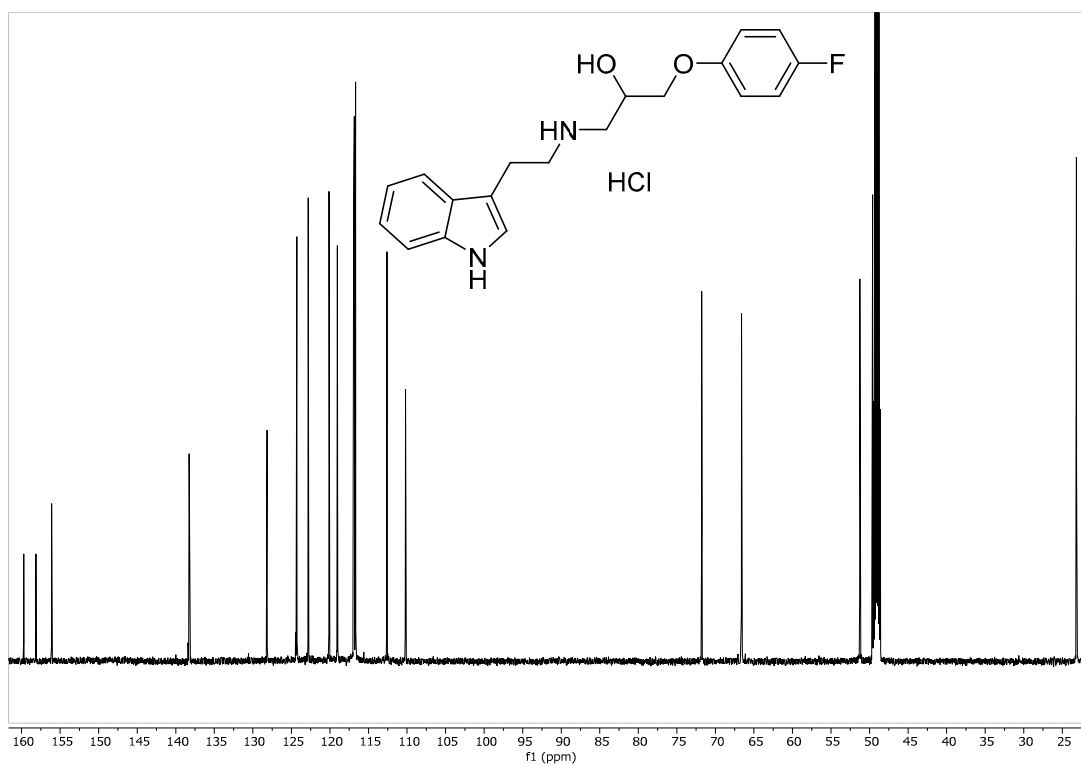

$^{13}\text{C}$  NMR (151 MHz, MeOD)  $\delta$  159.7, 158.1, 156.1, 156.1, 138.3, 128.2, 124.3, 122.8, 120.1, 119.0, 116.9, 116.9, 116.8, 116.7, 112.6, 110.2, 71.8, 66.6, 51.3, 49.6, 23.2.

C:/Users/thoma...6\_RA3\_01\_1175.d Injection 1 +MS profile DZAAK6 MS + spectrum 4.63

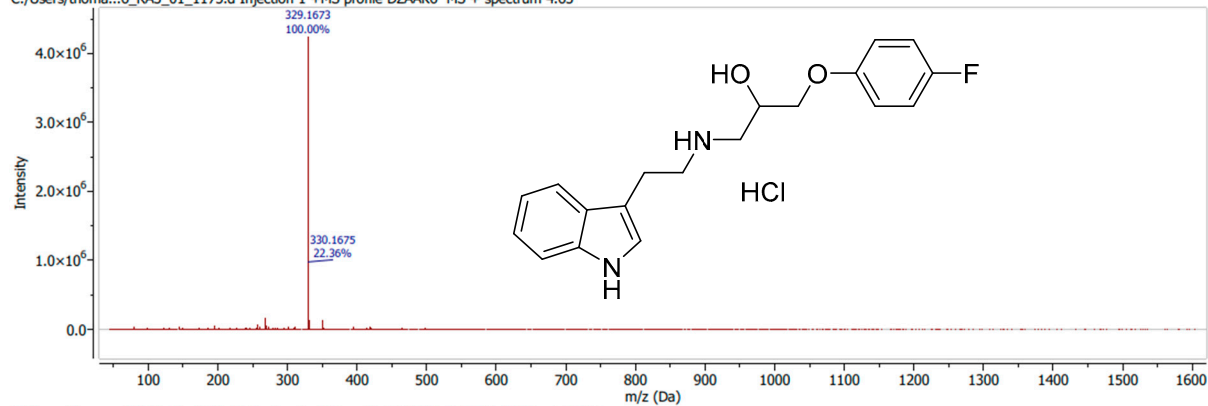

C:/Users/thoma...6\_RA3\_01\_1175.d Injection 1 +MS profile DZAAK6 EIC 329.166 Da  $\pm$  0.01 Da

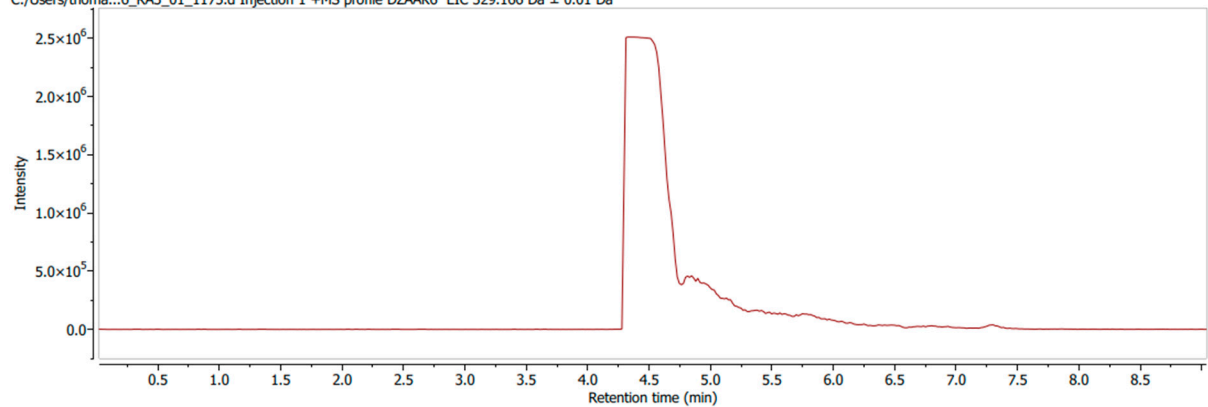

HRMS (ESI) calc.  $(M+H)^+$  329.1660 exp.  $(M+H)^+$  329.1673

F:/IR/TW2203281 - D2AAK6 - Mon Dec 19 13-38-11 2022 (GMT+01-00).SPA -

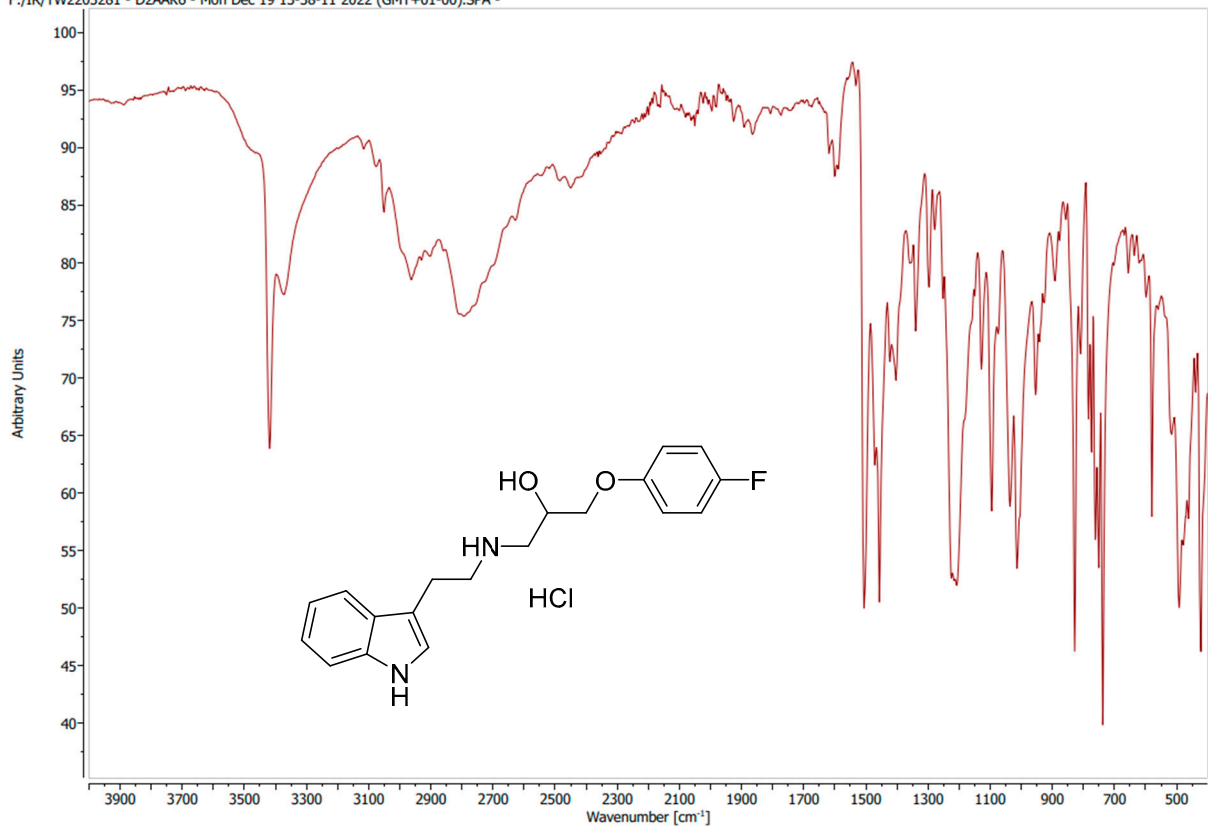

**1-((2-(1H-inden-3-yl)ethyl)amino)-3-phenoxypropan-2-ol (D2AAK7)**

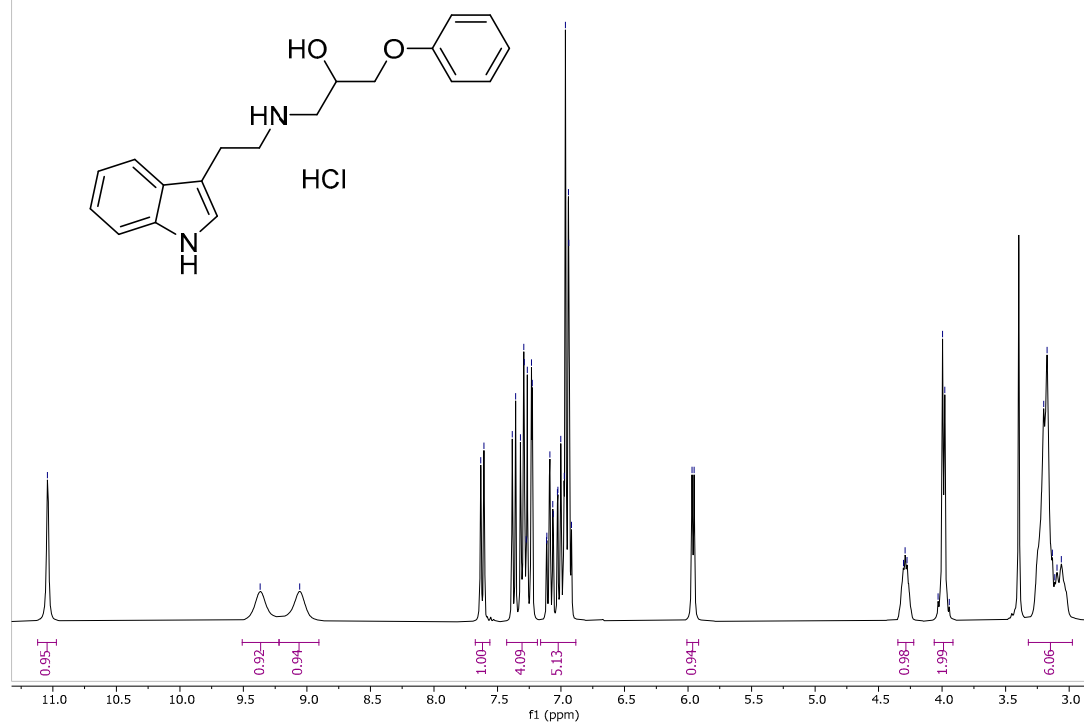

$^1\text{H}$  NMR (300 MHz, DMSO)  $\delta$  11.04 (s, 1H), 9.37 (s, 1H), 9.06 (s, 1H), 7.62 (d,  $J = 7.7$  Hz, 1H), 7.43 – 7.19 (m, 4H), 7.16 – 6.88 (m, 5H), 5.96 (d,  $J = 4.9$  Hz, 1H), 4.35 – 4.22 (m, 1H), 4.06 – 3.91 (m, 2H), 3.32 – 2.97 (m, 6H).

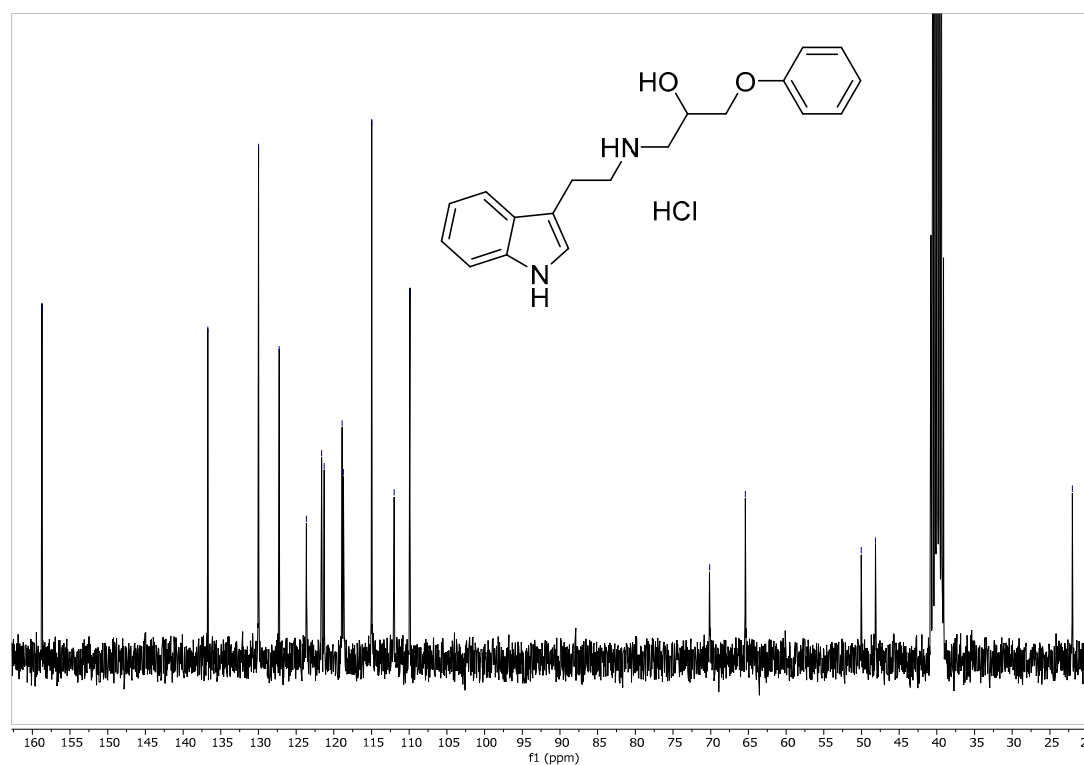

$^{13}\text{C}$  NMR (75 MHz, DMSO)  $\delta$  158.7, 136.7, 130.0, 127.2, 123.6, 121.6, 121.3, 118.9, 118.7, 115.0, 112.0, 109.9, 70.2, 65.4, 50.0, 48.1, 22.0.

C:/Users/thoma...7\_RA4\_01\_1176.d Injection 1 +MS profile DZAAK7 MS + spectrum 4.58

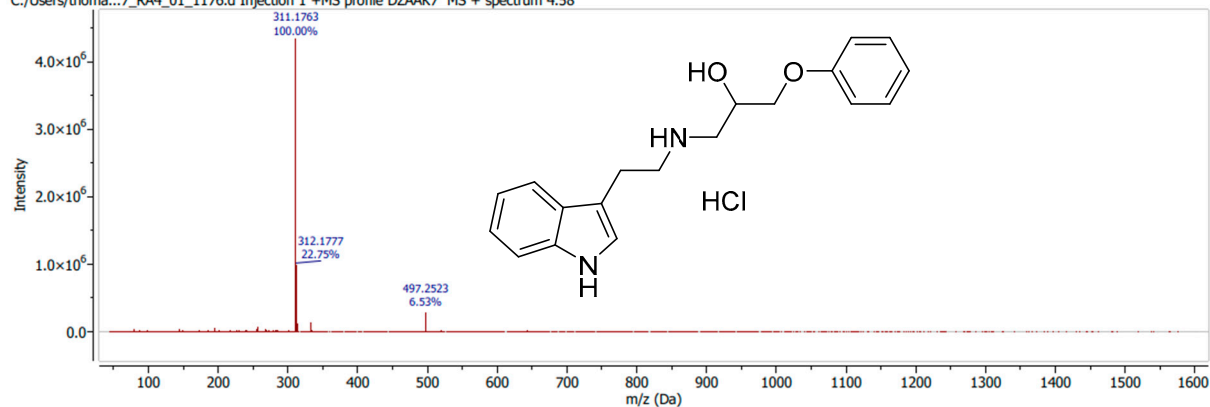

C:/Users/thoma...7\_RA4\_01\_1176.d Injection 1 +MS profile DZAAK7 EIC 311.175 Da  $\pm$  0.01 Da

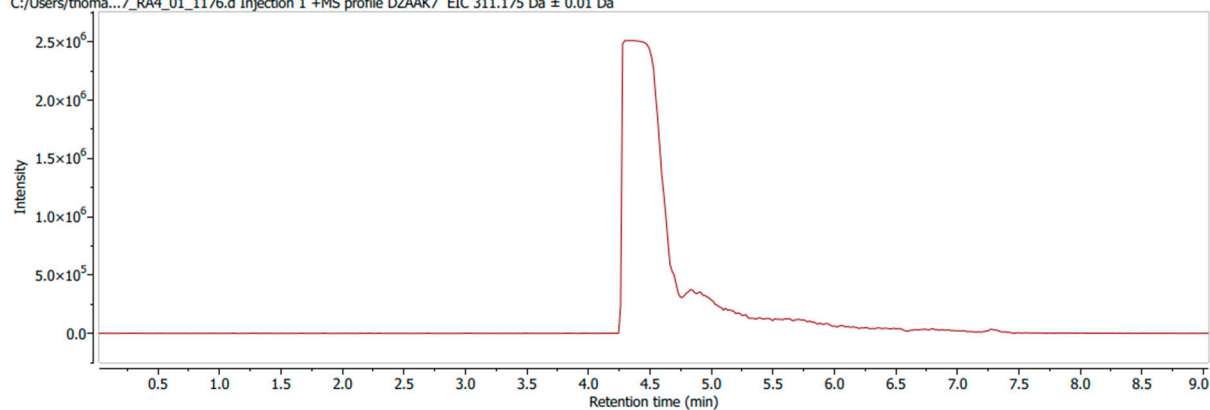

HRMS (ESI) calc. (M+H)<sup>+</sup> 311.1754 exp. (M+H)<sup>+</sup> 311.1763

F:/IR/DZAAK7 - Mon Dec 19 13-42-50 2022 (GMT+01-00).SPA -

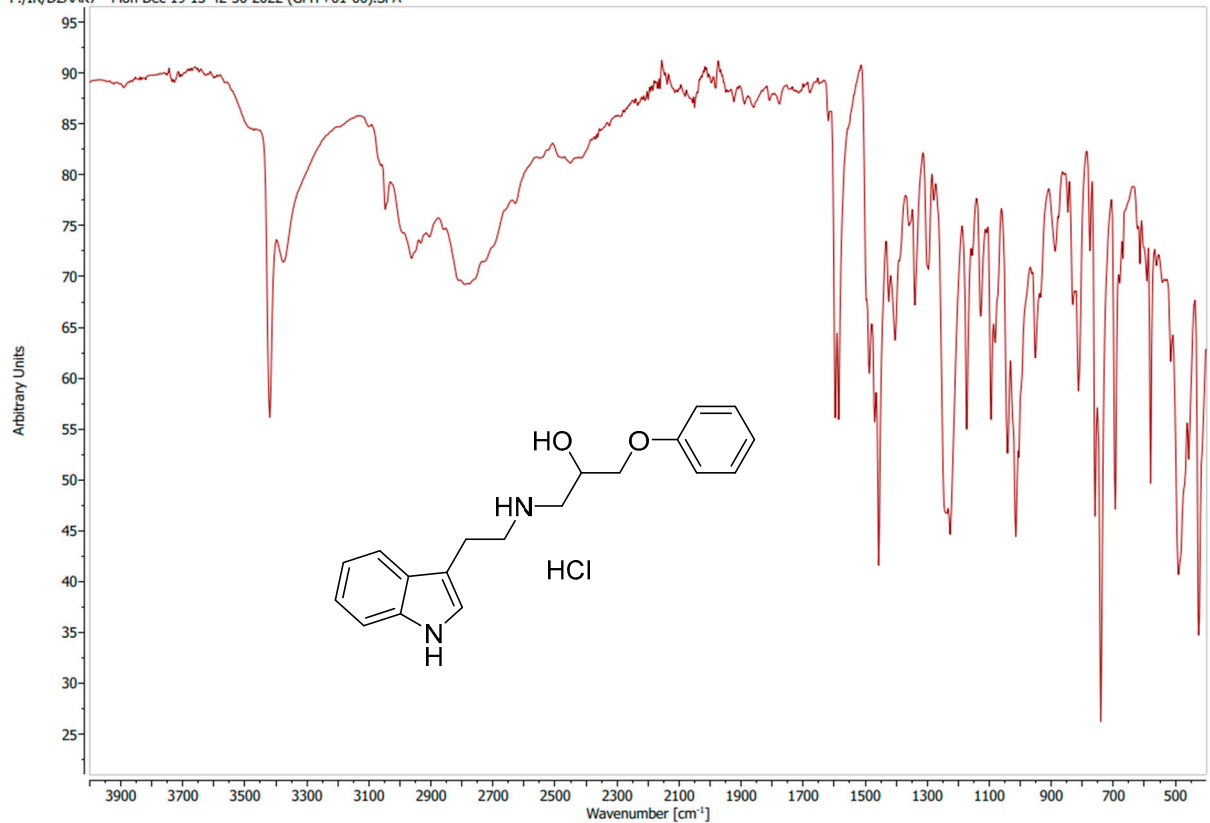

Supplement: s1 [file s1]
